# Supplementary material for: Clinical Clostridium difficile: Clonality and Pathogenicity Locus Diversity
Source: PLoS One. 2011 May 19;6(5):e19993. doi: 10.1371/journal.pone.0019993 (PMC3098275; doi:10.1371/journal.pone.0019993)
Supplement: Table S3 — Association of PCR-ribotype and ST. A total of 285 isolates were PCR-ribotyped; 242 isolates during the study and 43 isolates previously [22]. STs occurring with more than one PCR-ribotype and PCR-ribotypes occurring with more than one ST are shown in the table. The following PCR-ribotypes occurred with one ST (>1 isolate typed): 027-ST1 (n = 46), 002-ST8 (n = 12), 078-ST11 (n = 6), 018-ST17 (n = 6), 026-ST7 (n = 4), 081-ST9 (n = 4), 137-ST4 (n = 4), 017-ST37 (n = 3), 012-ST54 (n = 2). The following PCR-ribotypes occurred with one ST (1 isolate typed): 070-ST55, 129-ST13, 046-ST35, 216-ST33, 320-ST46, 010-ST15, 053-ST63, 054-ST43, 022-ST66, 316-ST59, 062-ST75, 097-ST21, 019-ST67, 319-ST74, 139-ST52, 110-ST19, 202-ST24, 140-ST26, 228-ST92, 326-ST91, 323-ST31, 138-ST23. (XLSX) [file pone.0019993.s004.xlsx]

## Sheet: Table 2
Clade	1	1	1	1	1	1	1	1	1	1	1	1	1	1	1	1	1	1	1	1	1	1	1	1	1	1	1	1	1	1	1	1	2	3	3	3
Ribotype	ST28	ST68	ST2	ST14	ST49	ST50	ST6	ST72	ST89	ST90	ST3	ST44	ST10	ST58	ST34	ST45	ST71	ST78	ST16	ST18	ST36	ST77	ST57	ST12	ST53	ST73	ST76	ST56	ST70	ST48	ST51	ST42	ST41	ST5	ST22	ST25	Total with ribotype
020	1	1	17																																		19
076			2																																		2
220			1																																		1
014			4	13	1	1																															19
005							12	1	1	1																											15
072											41																										41
001											8																										8
115											2																										2
009											1																										1
262											1																										1
305											1																										1
015												7	9																								16
056														2	1																						3
013																2	1	1																			4
050																			1	1																	2
011																					1	1															2
003																							1	1													2
225																								1													1
103																									1	1	1										3
021																												1	1								2
038																														1							1
104																														1							1
186																															1						1
249																															1						1
174																																1					1
106																																13	1				14
194																																	1				1
321																																	1				1
023																																		7	2	1	10
Isolates of these STs with ribotype	1	1	24	13	1	1	12	1	1	1	54	7	9	2	1	2	1	1	1	1	1	1	1	2	1	1	1	1	1	2	2	14	3	7	2	1	176
Total isolates of these STs with toxin gene sequences	2	1	86	28	17	1	59	3	1	1	54	46	43	18	1	11	1	1	14	10	11	2	2	8	7	1	1	3	1	3	2	68	3	43	5	1	436
